# Supplementary material for: Induction of Transgene Suppression in Plants via External Application of Synthetic dsRNA
Source: PubMed Central journal article supplement (PMC6479969; doi:10.3390/ijms20071585), 2019-03-29
Supplement: ijms-20-01585-s001.pdf [file ijms-20-01585-s001.pdf]

**Table S1** Primers used for amplification of the *NPTII* and *EGFP* transgenes in RT-PCR, qRT-PCRs, and bisulfite sequencing

| Gene name<br>(GenBank acc.<br>no)                          | Primer name                      | Primers, 5'-3'                                                                                             |
|------------------------------------------------------------|----------------------------------|------------------------------------------------------------------------------------------------------------|
| Primers for cDNA check-up on DNA contamination, 5'-3'      |                                  |                                                                                                            |
| AtGAPDH<br>(NM_111283)                                     | AtGapdh-s<br>AtGapdh-a           | CTG GAA TGT CTT TCC GTG TC<br>ATT CGT TGT CGT ACC ATG AC                                                   |
| Primers for PCR and real-time PCR, 5'-3'                   |                                  |                                                                                                            |
| EGFP<br>(U55762,<br>AY818363)                              | R1s<br>R1a<br>R2s<br>R2a         | CAAGCATTCTACTTCTATTG<br>CTCGCCCTTGCTCACCAT<br>TGCTGCTGCCCGACAACCACTAC<br>CTTGTACAGCTCGTCCATGCC             |
| <i>nptII</i> (AY818371)                                    | R3s<br>R3a<br>R4s<br>R4a         | TTGCTGAAGAGCTTGGCGGCGAAT<br>TCAGAAGAAGCTCGTCAAGAAGG<br>CACGACGGGCGTTCCTTGCGC<br>GATACTTTCTCGGCAGGAGCAA     |
| AtGAPDH<br>(NM_111283)                                     | AtGapdh-real-s<br>AtGapdh-real-a | TTG GTG ACA ACA GGT CAA GCA<br>AAA CTT GTC GCT CAA TGC AAT                                                 |
| AtUBQ<br>(NM_001084884)                                    | AtUBQ-realS<br>AtUBQ-realA       | GGCCTTGTATAATCCCTGATGAATAAG<br>AAAGAGATAACAGGAACGGAAACATAGT                                                |
| Specific primers for dsRNA design, 5'-3'                   |                                  |                                                                                                            |
| EGFP<br>(U55762,<br>AY818363)                              | D1s<br>D1a                       | TAATACGACTCACTATAGGGAGAATGGTGAGCAAGGGC<br>GAGGAG<br>TAATACGACTCACTATAGGGAGATTACTTGTACAGCTCGT<br>CCATG      |
| <i>nptII</i><br>(AY818371)                                 | D2s<br>D2a                       | TAATACGACTCACTATAGGGAGAATGTGGATTGAACAAG<br>ATGGATTG<br>TAATACGACTCACTATAGGGAGATCCACCATGATATTCG<br>GCAAGCAG |
| Specific primers for pET28a-EGFP design, 5'-3'             |                                  |                                                                                                            |
| EGFP<br>(U55762,<br>AY818363)                              |                                  | CTA CGG ATC CAT GGT GAG CAA GGG CGA GGA<br>GCA <u>TAA GCT TTT</u> ACT TGT ACA GCT CGT CCA                  |
| Primers for bisulfite DNA sequencing, 5'-3'                |                                  |                                                                                                            |
| EGFP<br>(U55762,<br>AY818363)                              | M1s<br>M1a                       | CAC CAT CTT CTT CAA RRA C<br>GTT GGG GTY TTT GYT YAG                                                       |
| <i>nptII</i><br>(AY818371)                                 | M2s<br>M2a                       | TTC TTT TTR TCA ARA CCR ACC<br>TGA TGC TYT TYG TYT AGA T                                                   |
| Primers for stem-loop RT-PCR, 5'-3'                        |                                  |                                                                                                            |
| EGFP-siRNA<br>(Pr008640320;<br>Pr120179)                   | stem-loop-RT1                    | GTTGGCTCTGGTGCAGGGTCCGAGGTATTCGCACCAGAG<br>CCAACAAGTTC                                                     |
|                                                            | stem-F1                          | GCGGCGGGAACGGCATCAAGGT                                                                                     |
|                                                            | universal-R1                     | GTGCAGGGTCCGAGGT                                                                                           |
| Primers for detection of the readthrough transcript, 5'-3' |                                  |                                                                                                            |
| EGFP (U55762,<br>AY818363)                                 | R2s                              | TGCTGCTGCCCGACAACCACTAC                                                                                    |
| <i>nptII</i> (AY818371)                                    | R4a                              | GATACTTTCTCGGCAGGAGCAA                                                                                     |

**Fig. S1** DNA sequencing of the amplification product including coding sequences of both the *EGFP* and *NPTII* transgenes and their regulatory elements. Highlighted in orange and green are the *EGFP* and *NPTII* coding sequences, respectively; highlighted in brown and blue are the sequences of nopaline synthase terminator and the double CaMV 35S promoter. The positions of primers are underlined.

TGCTGCTGCCCGACAACCACTACCTGAGCACCCAGTCCGCCCTGAGCAAAGACCCCAACGAGAAGCGGATCACATGGTC  
CTGCTGGAGTTCGTGACCGCCCGGGATCACTCTCGGCATGGACGAGCTGTACAAGTCCGGACTCAGATCTCGAGCTCAA  
GCTTCGAATTCTGCAGTCGACGGTACCGCGGGCCCGGGATCCACCTGATCTAGATCCCGATCGTTCAAACATTGGCAATA  
AAGTTTCTTAAGATTGAATCCTGTTGCCGGTCTTGCGATGATTATCATATAATTTCTGTTGAATTACGTTAAGCATGTAATAA  
TTAACATGTAATGCATGACGTTATTTATGAGATGGGTTTTATGATTAGAGTCCCGCAATTATACATTTAATACGCGATAGA  
AAACAAAATATAGCGCGCAAACCTAGGATAAATTATCGCGCGCGGTGTCATCTATGTTACTAGATCGGGCGGCCGACCCA  
TAATACCCATAATAGCTGTTTGCCATCGCTACCTTAGGACCGTTATAGTTAACCAGGTCAACATGTGGAGCAGCACACACT  
GTCTACTCCAAAAATATCAAAGATACAGTCTCAGAAGACCAAAGGGCAATTGAGACTTTTCAACAAAGGGTAATATCCGG  
AAACCTCCTCGGATTCCATTGCCAGCTATCTGTCACTTTATTGTGAAGATAGTGGAAAAGGAAGGTGGCTCCTACAAATG  
CCATCATTGCGATAAAGGAAAGGCCATCGTTGAAGATGCCTCTGCCGACAGTGGTCCCAAAGATGGACCCCCACCCACGA  
GGAGCATCGTGGAAAAGAAGACGTTCCAACCACGTCTTCAAAGCAAGTGGATTGATGTGATAACATGGTGGAGCAGCAG  
ACACTTGTCTACTCCAAAAATATCAAAGATACAGTCTCAGAAGACCAAAGGGCAATTGAGACTTTTCAACAAAGGGTAAT  
ATCCGGAAACCTCCTCGGATTCCATTGCCAGCTATCTGTCACTTTATTGTGAAGATAGTGGAAAAGGAAGGTGGCTCCTA  
CAAATGCCATCATTGCGATAAAGGAAAGGCCATCGTTGAAGATGCCTCTGCCGACAGTGGTCCCAAAGATGGACCCCCAC  
CCACGAGGAGCATCGTGGAAAAGAAGACGTTCCAACCACGTCTTCAAAGCAAGTGGATTGATGTGATATCTCCACTGAC  
GTAAGGGATGACGCACAATCCCACTATCCTTCGCAAGACCCTTCCTCTATATAAGGAAGTTCATTTCAATTTGGAGAGGACG  
TCGAGAGTTCTCAACACACAACATATACAAAACAAACGAATCTCAAGCAATCAAGCATTCTACTTCTATTGCAGCAATTTAAA  
TCATTTCTTTAAAGCAAAGCAATTTCTGAAAATTTTACCATTACGAACGATAGCCATGGTCCGGACTCAGATCTCGA  
GCTCAAGCTTCGAATTCGTGAGTCGACATGATTGAACAAGATGGATTGCACGCAGGTTCTCCGGCCGCTTGGGTGGAGAGG  
CTATTCCGGCTATGACTGGGCACAACAGACAATCGGCTGCTCTGATGCCGCCGTGTTCCGGCTGTCAGCGCAGGGGCGCCCG  
GTTCTTTTTGTCAAGACCGACCTGTCCGGTGCCTGAATGAACTGCAGGACGAGGCAGCGCGGCTATCGTGGCTGGCCACG  
ACGGGCGTTCCTTGCAGCTGTGCTCGACGTTGCTACTGAAGCGGAAGGGACTGGCTGCTATTGGGCGAAGTCCCGGGG  
CAGGATCTCCTGTCTCTCACCTTGCTCCTGCCGAGAAAGTATCCATCATGGCTGATGCAATGCGGCGGCTGCATACGCTTG  
ATCCGGCTACCTGCCATTGACCACCAAGCGAAACATCGCATCGAGCGAGCAGTACTCGGATGGAAGCCGGTCTTGTG  
GATCAGGATGATCTGGACGAAGAGCATCAGGGGCTCGCGCCAGCCGAAGTTCGCCAGGCTCAAGGCGCGCATGCCCGA  
CGGCGATGATCTCGTCGTGACCCATGGCGATGCCTGCTTGCCGAATATCATGGTGGAAAATGGCCGCTTTTCTGGATTATC  
GACTGTGGCCGGCTGGGTGTGGCGGACCGCTATCAGGACATAGCGTTGGCTACCCGTGATATTGCTGAAGAGCTTGGCGGC  
GAATGGGCTGACCGCTTCCTCGTGCTTTACGGTATCGCCGCTCCCGATTTCGCAGCGCATCGCCTTCTATCGCCTTCTTGACG  
AGTTCCTCTGA
